# Supplementary material for: The antidiabetic effects of Bifidobacterium longum subsp. longum BL21 through regulating gut microbiota structure in type 2 diabetic mice
Source: Royal Society of Chemistry journal article supplement (doi:10.1039/d2fo01109c), 2022-01-01
Supplement: d2fo01109c1.pdf [file d2fo01109c1.pdf]

**Table S1**

**The sensitivity of the kits**

| Kits          | Sensitivity |
|---------------|-------------|
| SOD           | 5 U/mL      |
| AST           | 0.001 U/L   |
| CAT           | 5 U/mL      |
| ALT           | 0.001 U/L   |
| IL-1 $\beta$  | <1.0 pg/mL  |
| LPS           | <1.0 EU/L   |
| TNF- $\alpha$ | <1.0 pg/mL  |
| occludin      | <1.0 ng/mL  |
| ZO-1          | <1.0 ng/mL  |
| claudin       | <1.0 pg/mL  |
